# Supplementary material
Source: PubMed Central journal article supplement (PMC3959156)
Supplement: ja412375j_si_001.pdf [file ja412375j_si_001.pdf]

## Supporting information

Long-wavelength limit of photochemical energy conversion in  
Photosystem I

Eberhard Schlodder<sup>‡\*</sup>, Friedhelm Lenzian<sup>‡</sup>, Jenny Meyer<sup>‡</sup>, Marianne Çetin<sup>‡</sup>, Marc  
Brecht<sup>§†</sup>, Thomas Renger<sup>⊥</sup>, and Navasard V. Karapetyan<sup>||</sup>

<sup>‡</sup> Max-Volmer-Laboratorium für Biophysikalische Chemie, Technische Universität  
Berlin, Strasse des 17. Juni 135, 10623 Berlin, Germany

<sup>||</sup> A.N. Bach Institute of Biochemistry, Russian Academy of Sciences, Leninsky  
Prospect, 33, 119071 Moscow, Russia

<sup>§</sup> Institut für Physikalische und Theoretische Physik, Eberhard-Karls-Universität  
Tübingen, Auf der Morgenstelle 14, 71976 Tübingen, Germany

<sup>⊥</sup> Institut für Theoretische Physik, Johannes Kepler Universität, Abteilung  
Theoretische Biophysik, Austria

Keywords: Photosystem I, P700, energy transfer, far-red excitation, long-wavelength  
antenna chlorophyll, charge transfer state, *Arthrospira platensis*,  
*Thermosynechococcus elongatus*

Corresponding author: Eberhard Schlodder, eberhard.schlodder@tu-berlin.de

Figure S1

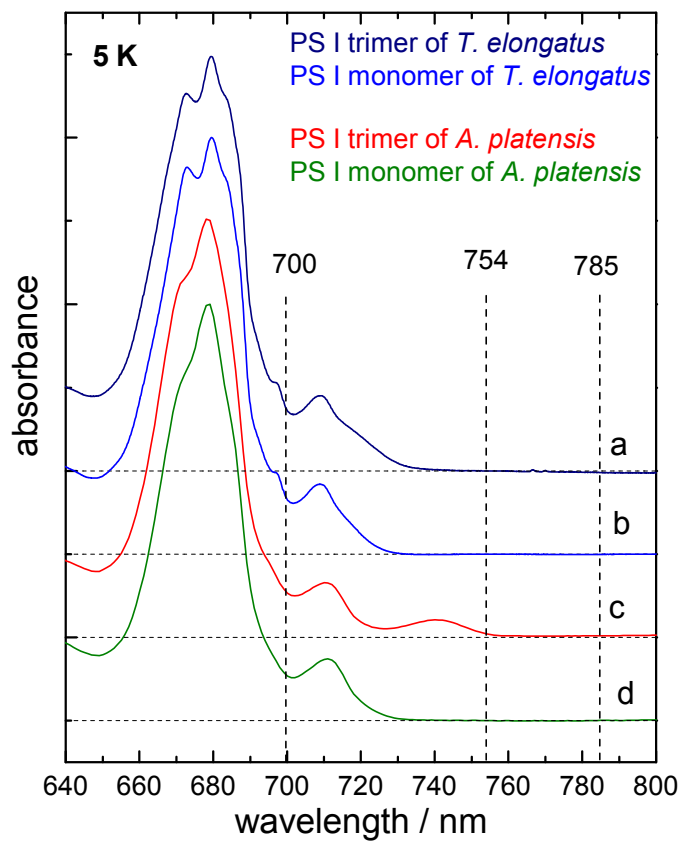

**Figure S1:** 5 K absorbance spectra from (a) PS I trimers from *T. elongatus*, (b) PS I monomers from *T. elongatus*, (c) PS I trimers from *A. platensis*, and (d) PS I monomers from *A. platensis*. Absorbance bands beyond 700 nm are assigned to long-wavelength chlorophylls. The spectra have been normalized to the same maximum amplitude. The PS I concentration is too low, to resolve absorbance above 750 nm.

Figure S2

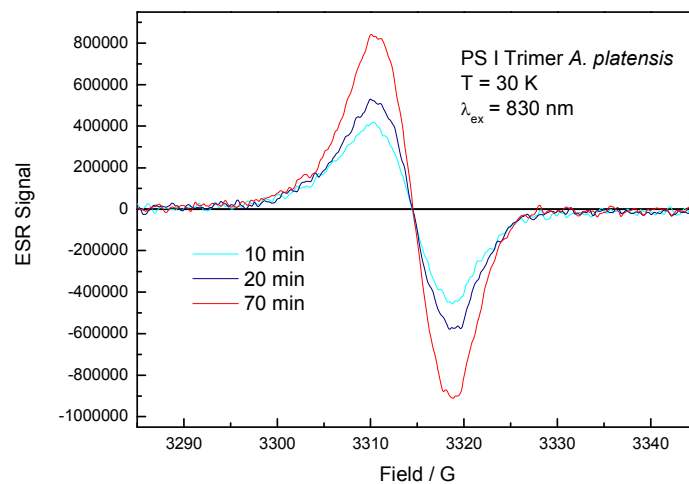

**Figure S2:** EPR spectra of PS I trimers from *A. platensis* at 30 K after different illumination periods with 830 nm laser light (laser diode HL8318G von Hitachi, cw, power 25 mW). The EPR spectra demonstrate that even excitation at 830 nm induces the formation of P700<sup>+</sup>.
